# Supplementary material
Source: PubMed Central journal article supplement (PMC11386852)
Supplement: PBI-17-1938-s001.pdf [file PBI-17-1938-s001.pdf]

## Additional Files

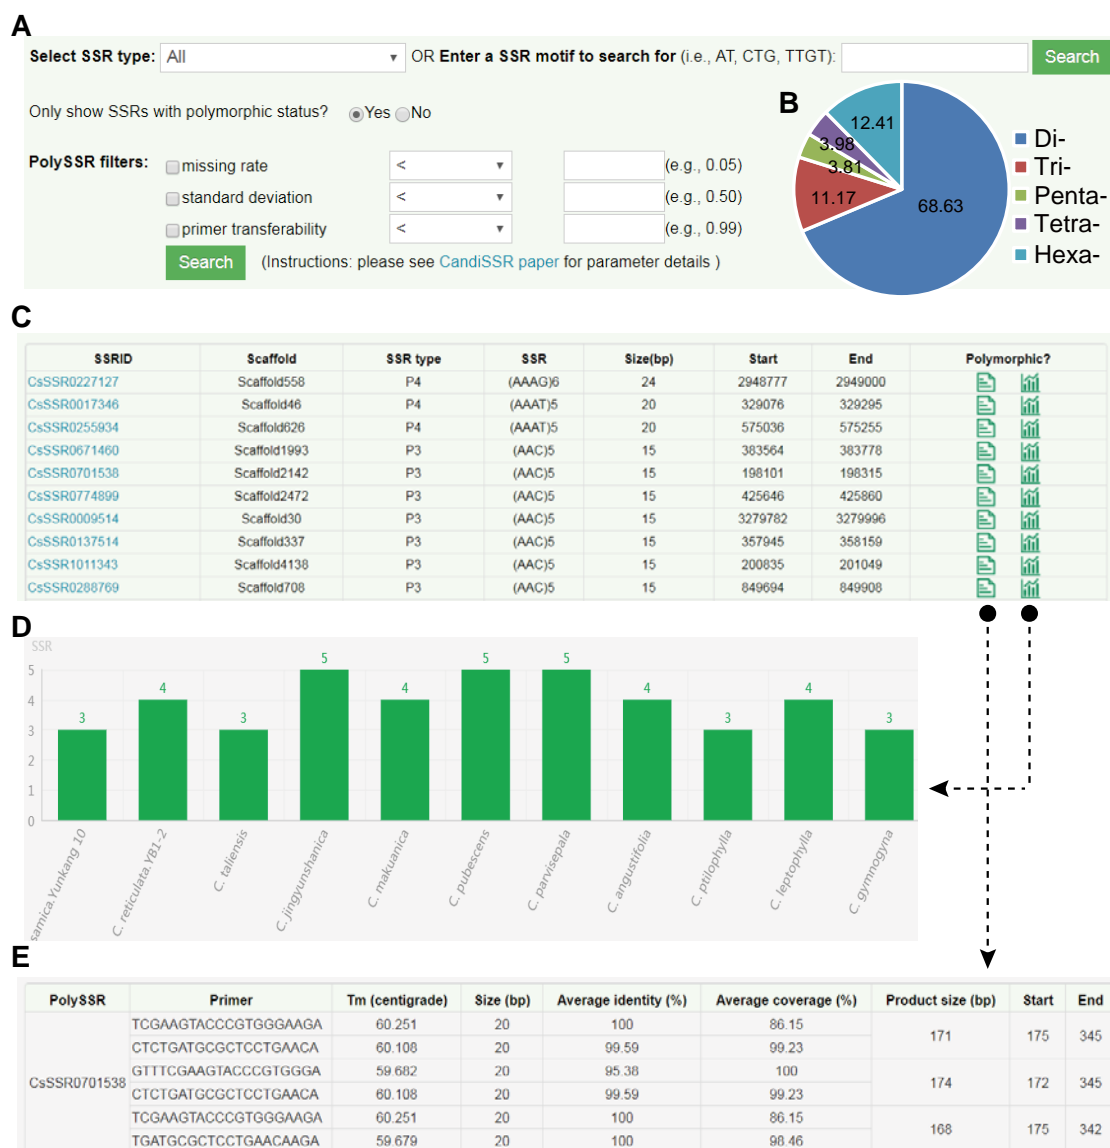

**Figure S1 Analysis of SSRs in tea plant genome.** (A) SSR selection; (B) SSR statistic; (C) Search result of specific SSRs; (D) SSR Polymorphism among 11 representative tea plant species; and (E) Three primer pairs designed for each polymorphic SSR.

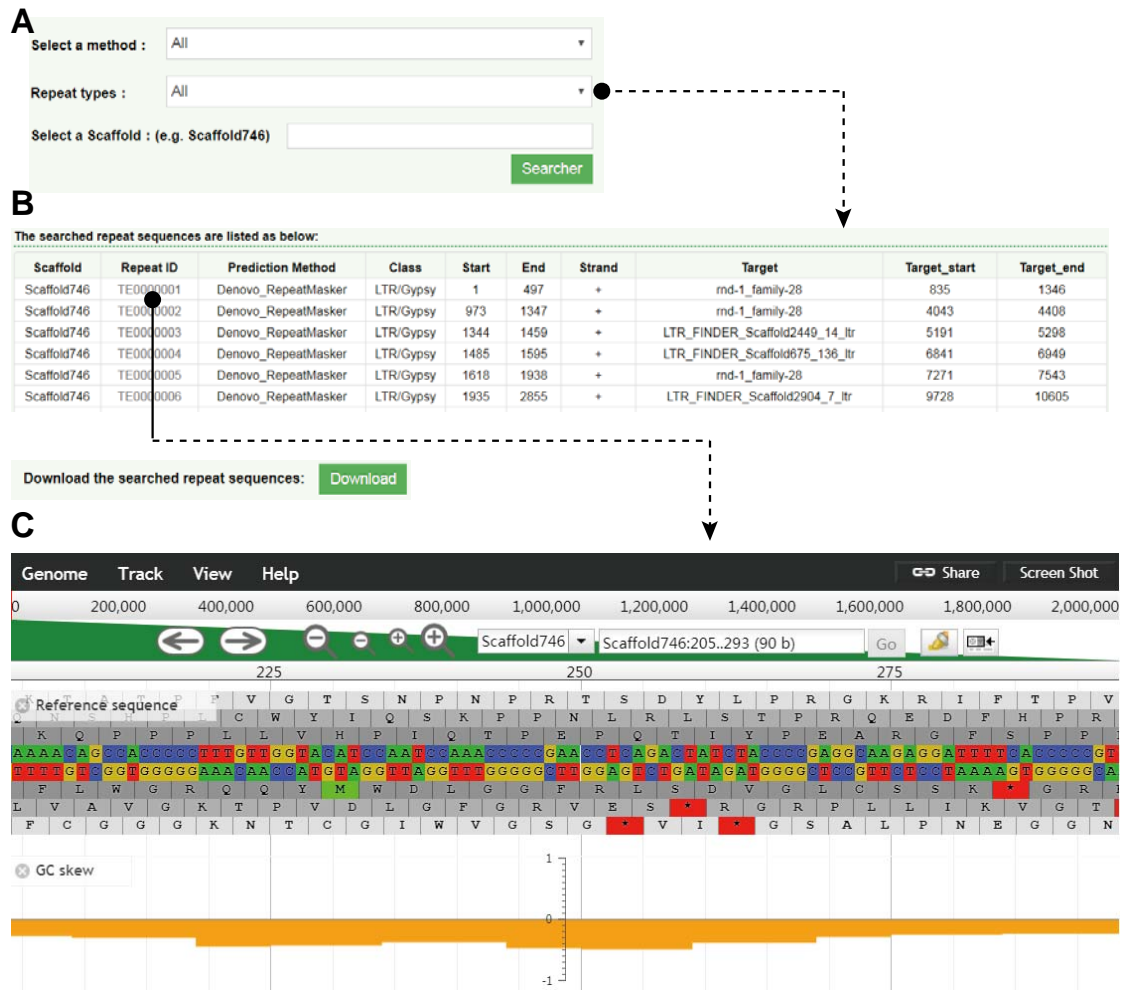

**Figure S2 Analysis of repeat sequences in tea plant genome. (A)** Annotation method, repeat type and scaffolds selection; **(B)** Search result of specific repeat sequences with download; and **(C)** Visualization of repeat sequences using JBrowse.

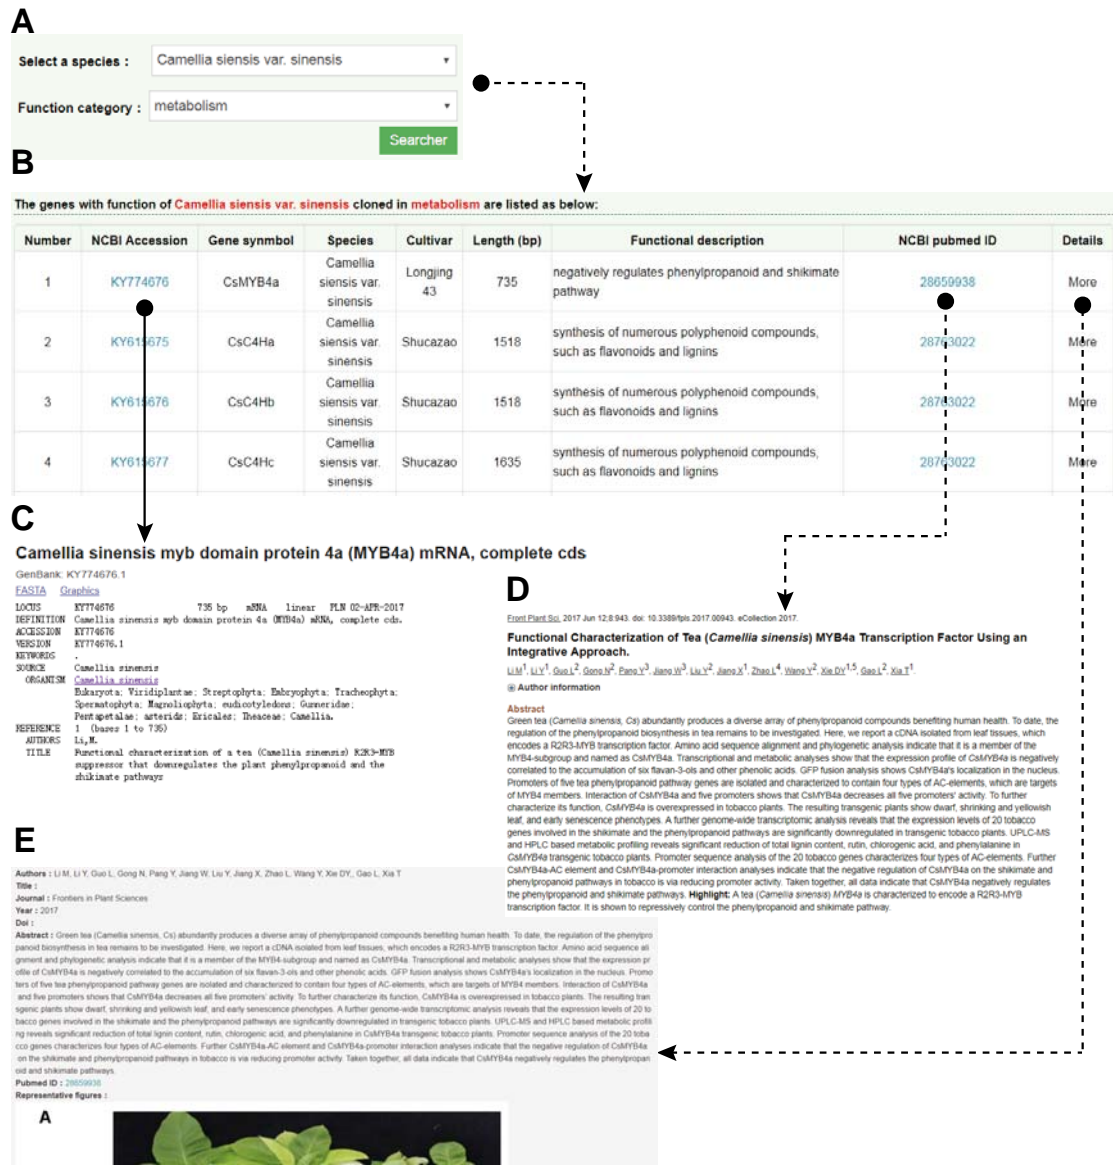

**Figure S3 Abundant and well organized functionally characterized genes of tea plant.** (A) Species and functional category selection; (B) Search result of metabolism related genes in *Camellia sinensis* var. *sinensis*; (C) Sequence records in NCBI nucleotide database; (D) Related reference in PubMed; and (E) Detail information of the collected genes, particularly the representative figures of functional experiments.

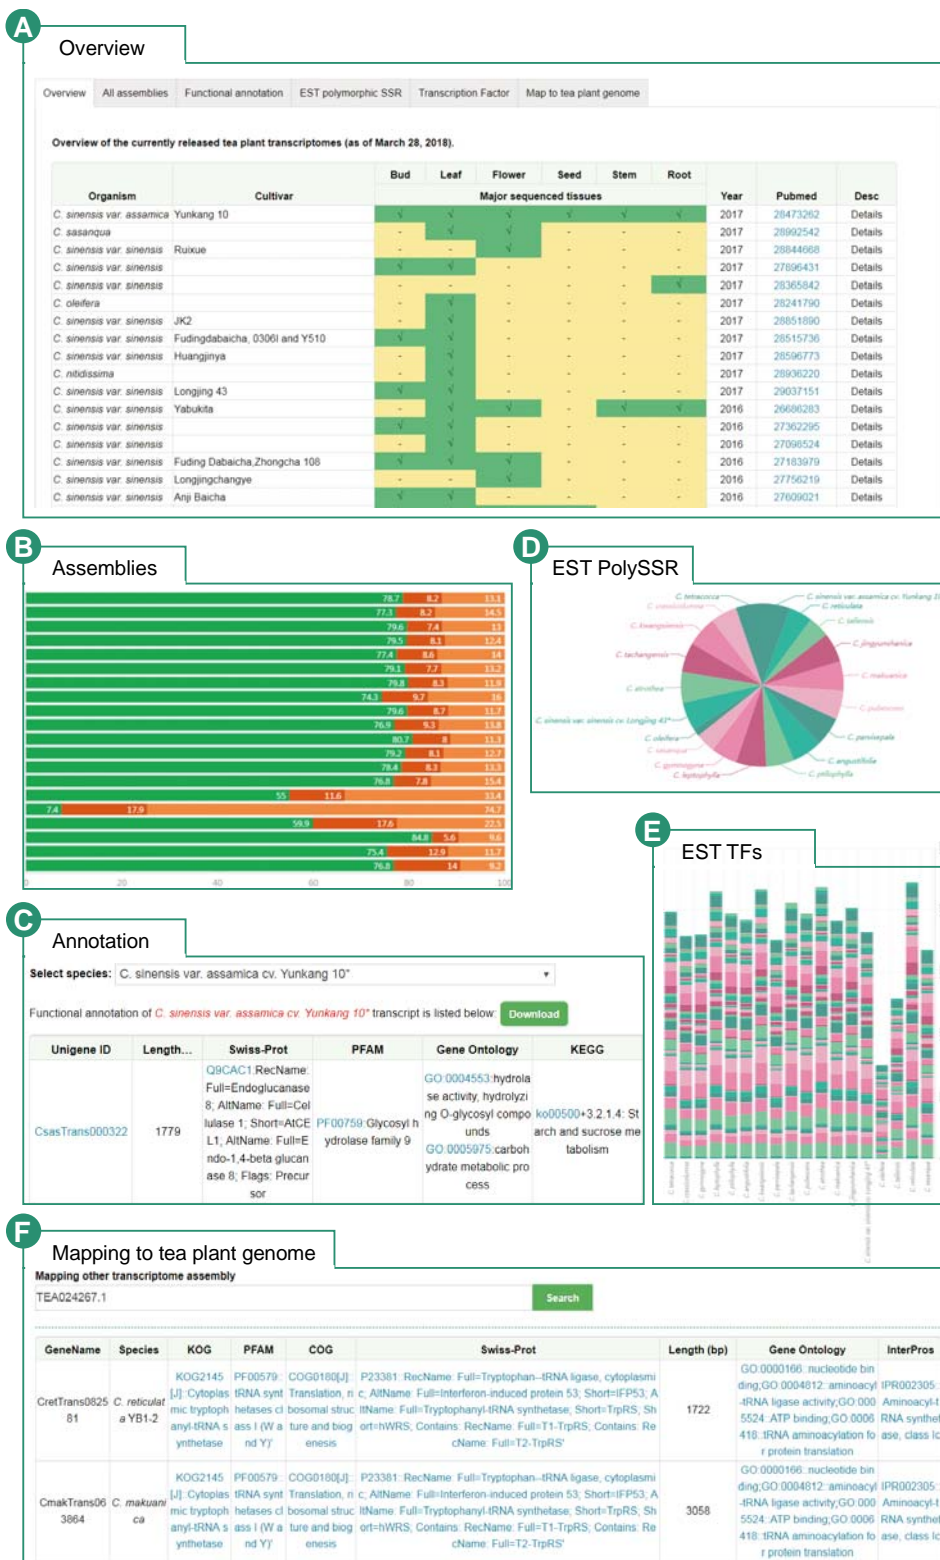

**Figure S4 Collection and utilization of tea plant transcriptomes.** (A) Overview of the transcriptome collection; (B) Assemblies; (C) Functional annotations, (D) EST polymorphic SSRs, (E) EST transcription factors, and (F) Mapping the transcripts to tea plant genome.

**A** Search Interface

Overview of the germplasm resources of tea plant world

Species :

Country/Origin :

Are the marker sequences (eg., SSR and cpDNA) available?  Yes  No



**B** Germplasms

|            |                           |
|------------|---------------------------|
| Accession: | CNE091                    |
| Name:      | Shifocui (石佛翠)            |
| Voucher:   | GS2010006                 |
| Notes:     | C. sinensis var. sinensis |
| Notes:     | China, Anhui              |
| latitude:  | 30.6006773                |
| longitude: | 117.9249002               |
| Notes:     | 岳西县石佛群体                   |
| Pubmed_ID: | <a href="#">24405939</a>  |

more details ●

**C** More Details

|             |                                   |
|-------------|-----------------------------------|
| Accession:  | CSS0135                           |
| Name/Group: | Anhui 1                           |
| Voucher:    | GLM-154096                        |
| Species:    | C. sinensis var. sinensis         |
| Morphotype: | China type                        |
| Origin:     | China, Anhui                      |
| Latitude:   | 30.6006773                        |
| longitude:  | 117.9249002                       |
| Pubmed ID:  | <a href="#">27218820,29422908</a> |

**D** Literatures

Front Plant Sci. 2018 Jan 25;8:2270. doi: 10.3389/fpls.2017.02270. eCollection 2017.

**Domestication Origin and Breeding History of the Tea Plant (*Camellia sinensis*) in China and India Based on Nuclear Microsatellites and cpDNA Sequence Data.**

Meegahakumbura MK<sup>1,2,3,4</sup>, Wambulwa MC<sup>1,2,3,5</sup>, Li MM<sup>1,3</sup>, Thapa KK<sup>6</sup>, Sun YS<sup>7</sup>, Möller M<sup>8</sup>, Xu JC<sup>9</sup>, Yang JB<sup>2</sup>, Liu J<sup>1</sup>, Liu BY<sup>10</sup>, Li DZ<sup>1,2,3</sup>, Gao LM<sup>1</sup>.

⊕ Author information

**Figure S5 Rapid retrieval of tea plant germplasm information.** (A) Search interface; (B) Searched germplasms; (C) Details of the search results; and (D) Related literatures.
